# Supplementary material for: Kinetics of the reaction of aqueous iron(vi) (FeVIO42−) with ethylenediaminetetraacetic acid
Source: Royal Society of Chemistry journal article supplement (doi:10.1039/b715154c), 2008-01-01
Supplement: b715154c.pdf [file b715154c.pdf]

### Text S1

In the pH range studied, all four species of Fe(VI) ( $\text{H}_3\text{FeO}_4^+$ ,  $\text{H}_2\text{FeO}_4$ ,  $\text{HFeO}_4^-$ ,  $\text{FeO}_4^{2-}$ ) can possibly react with the five species of EDTA ( $\text{H}_4\text{Y}$ ,  $\text{H}_3\text{Y}^-$ ,  $\text{H}_2\text{Y}^{2-}$ ,  $\text{HY}^{3-}$ , and  $\text{Y}^{4-}$ ) (equations S1-S20).

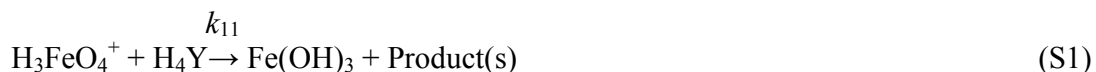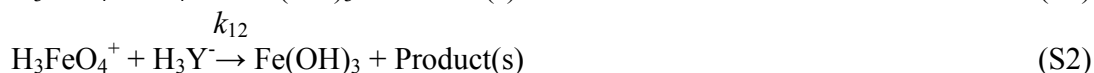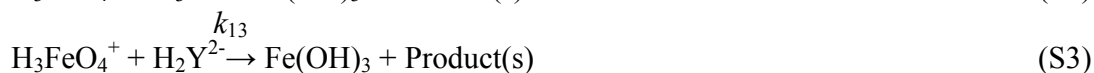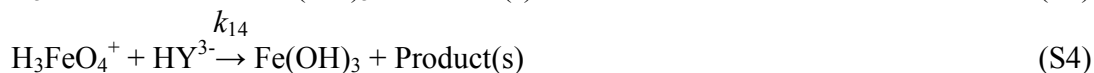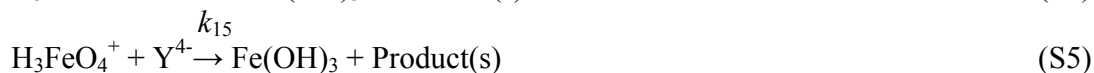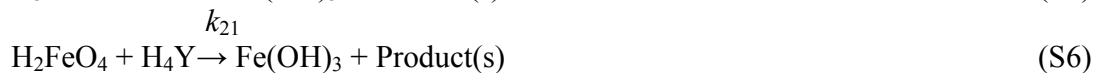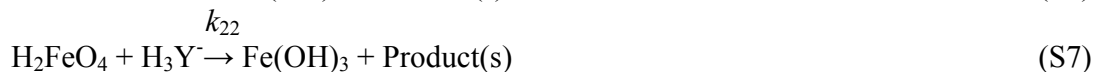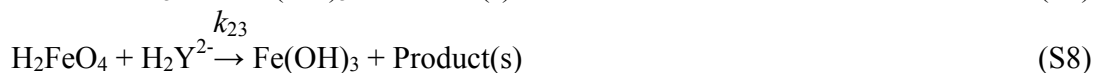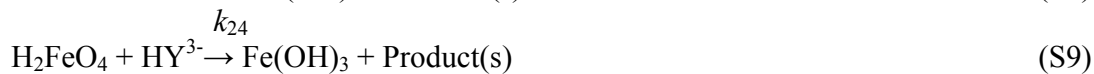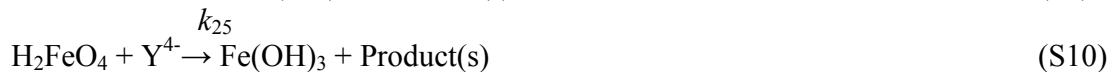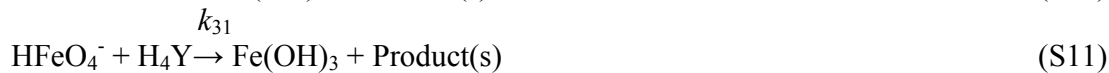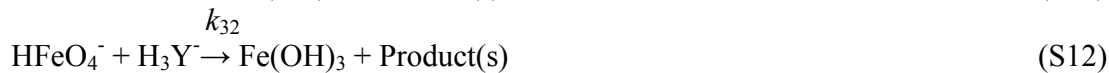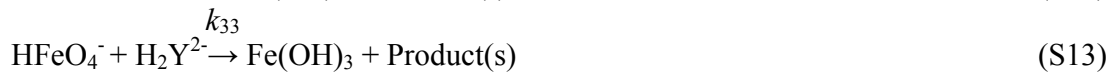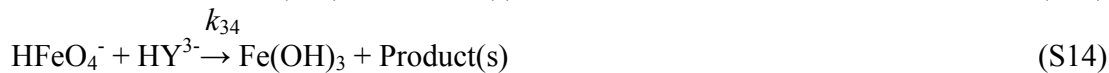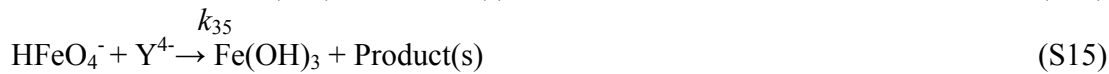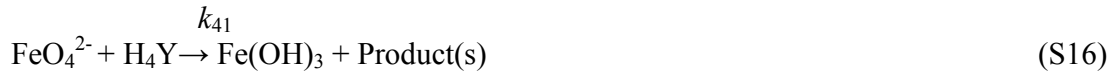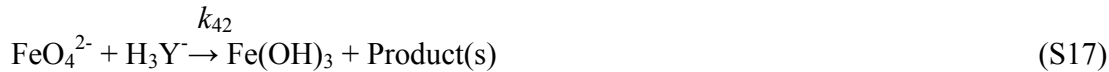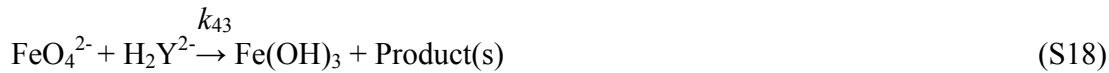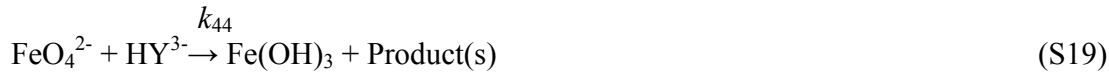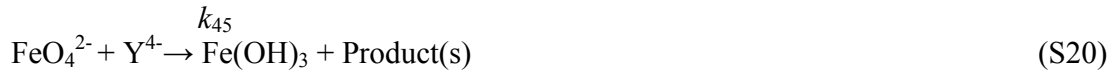

The rate of disappearance of Fe(VI) is given by:

$$\begin{aligned}
 -d[\text{Fe(VI)}]_{\text{tot}}/dt = & k_{11}[\text{H}_3\text{FeO}_4^+][\text{H}_4\text{Y}] + k_{12}[\text{H}_3\text{FeO}_4^+][\text{H}_3\text{Y}^-] + k_{13}[\text{H}_3\text{FeO}_4^+][\text{H}_2\text{Y}^{2-}] \\
 & k_{14}[\text{H}_3\text{FeO}_4^+][\text{HY}^{3-}] + k_{15}[\text{H}_3\text{FeO}_4^+][\text{Y}^{4-}] + k_{21}[\text{H}_2\text{FeO}_4][\text{H}_4\text{Y}] + k_{22}[\text{H}_2\text{FeO}_4][\text{H}_3\text{Y}^-] + \\
 & k_{23}[\text{H}_2\text{FeO}_4][\text{H}_2\text{Y}^{2-}] + k_{24}[\text{H}_2\text{FeO}_4][\text{HY}^{3-}] + k_{25}[\text{H}_2\text{FeO}_4][\text{Y}^{4-}] + k_{31}[\text{HFeO}_4^-][\text{H}_4\text{Y}] + k_{32}[\text{HFeO}_4^-] \\
 & [\text{H}_3\text{Y}^-] + k_{33}[\text{HFeO}_4^-][\text{H}_2\text{Y}^{2-}] + k_{34}[\text{HFeO}_4^-][\text{HY}^{3-}] + k_{35}[\text{HFeO}_4^-][\text{Y}^{4-}] + k_{41}[\text{FeO}_4^{2-}][\text{H}_4\text{Y}] + \\
 & k_{42}[\text{FeO}_4^{2-}][\text{H}_3\text{Y}^-] + k_{43}[\text{FeO}_4^{2-}][\text{H}_2\text{Y}^{2-}] + k_{44}[\text{FeO}_4^{2-}][\text{HY}^{3-}] + k_{45}[\text{FeO}_4^{2-}][\text{Y}^{4-}] \quad (\text{I})
 \end{aligned}$$

By using the fraction of speciation of Fe(VI) and glycine ( $K_{a1}$ ,  $K_{a2}$ , and  $K_{a3}$  are the equilibrium constants involving  $\text{H}_3\text{FeO}_4^+$ ,  $\text{H}_2\text{FeO}_4$  and  $\text{HFeO}_4^-$ ;  $K_3$ ,  $K_4$ ,  $K_5$ , and  $K_6$  are the equilibrium constants involving  $\text{H}_4\text{EDTA}$ ,  $\text{H}_3\text{EDTA}^-$ ,  $\text{H}_2\text{EDTA}^{2-}$ , and  $\text{HEDTA}^{3-}$ ), equation I can then be written as:

$$\begin{aligned}
 -d[\text{Fe(VI)}]_{\text{tot}}/dt = & [(k_{11}[\text{H}^+]^7 + k_{12}K_3[\text{H}^+]^6 + k_{13}K_3K_4[\text{H}^+]^5 + k_{14}K_3K_4K_5[\text{H}^+]^4 + k_{15}K_3K_4K_5K_6[\text{H}^+]^3 + k_{21}K_{a1}[\text{H}^+]^6 + k_{22}K_{a1}K_{a3}[\text{H}^+]^5 \\
 & + k_{23}K_{a1}K_3K_4[\text{H}^+]^4 + k_{24}K_{a1}K_3K_4K_5[\text{H}^+]^3 + k_{25}K_{a1}K_3K_4K_5K_6[\text{H}^+]^2 + k_{31}K_{a1}K_{a2}[\text{H}^+]^5 + k_{32}K_{a1}K_{a2}K_3[\text{H}^+]^4 \\
 & + k_{33}K_{a1}K_{a2}K_3K_4[\text{H}^+]^3 + k_{34}K_{a1}K_{a2}K_3K_4K_5[\text{H}^+]^2 + k_{35}K_{a1}K_{a2}K_3K_4K_5K_6[\text{H}^+] + k_{41}K_{a1}K_{a2}K_{a3}[\text{H}^+]^4 \\
 & + k_{42}K_{a1}K_{a2}K_{a3}K_3[\text{H}^+]^3 + k_{43}K_{a1}K_{a2}K_{a3}K_3K_4[\text{H}^+]^2 + k_{44}K_{a1}K_{a2}K_{a3}K_3K_4K_5[\text{H}^+] + k_{45}K_{a1}K_{a2}K_{a3}K_3K_4K_5K_6)/Z][\text{Fe(VI)}]_{\text{tot}}[\text{EDTA}]_{\text{tot}} \quad (\text{II})
 \end{aligned}$$

$$\begin{aligned}
 \text{where } Z = & [\text{H}^+]^7 + K_3[\text{H}^+]^6 + K_3K_4[\text{H}^+]^5 + K_3K_4K_5[\text{H}^+]^4 + K_3K_4K_5K_6[\text{H}^+]^3 + K_{a1}[\text{H}^+]^6 + \\
 & K_{a1}K_3[\text{H}^+]^5 + K_{a1}K_3K_4[\text{H}^+]^4 + K_{a1}K_3K_4K_5[\text{H}^+]^3 + K_{a1}K_3K_4K_5K_6[\text{H}^+]^2 + K_{a1}K_{a2}[\text{H}^+]^5 + \\
 & K_{a1}K_{a2}K_3[\text{H}^+]^4 + K_{a1}K_{a2}K_3K_4[\text{H}^+]^3 + K_{a1}K_{a2}K_3K_4K_5[\text{H}^+]^2 + K_{a1}K_{a2}K_3K_4K_5K_6[\text{H}^+] + \\
 & K_{a1}K_{a2}K_{a3}[\text{H}^+]^4 + K_{a1}K_{a2}K_{a3}K_3[\text{H}^+]^3 + K_{a1}K_{a2}K_{a3}K_3K_4[\text{H}^+]^2 + K_{a1}K_{a2}K_{a3}K_3K_4K_5[\text{H}^+] + \\
 & K_{a1}K_{a2}K_{a3}K_3K_4K_5K_6 \quad (\text{III})
 \end{aligned}$$

**Table S1.** Fe(VI) oxidation of EDTA at different pH at 25°C.

| pH    | [EDTA], M                    | $k$ , $M^{-1}s^{-1}$             | order(n)        |
|-------|------------------------------|----------------------------------|-----------------|
| 1.98  | $[0.25-1.00] \times 10^{-3}$ | $(4.19 \pm 0.58) \times 10^4$    | $1.01 \pm 0.13$ |
| 2.16  | $[0.25-1.00] \times 10^{-3}$ | $(3.36 \pm 0.23) \times 10^4$    | $0.88 \pm 0.08$ |
| 2.42  | $[0.60-1.50] \times 10^{-3}$ | $(2.31 \pm 0.24) \times 10^4$    | $1.07 \pm 0.12$ |
| 2.72  | $[0.60-1.50] \times 10^{-3}$ | $(1.14 \pm 0.07) \times 10^4$    | $0.80 \pm 0.03$ |
| 3.43  | $[1.20-1.50] \times 10^{-3}$ | $(8.76 \pm 0.80) \times 10^3$    | $0.74 \pm 0.04$ |
| 3.46  | $[0.13-1.00] \times 10^{-3}$ | $(6.66 \pm 0.24) \times 10^3$    | $1.07 \pm 0.05$ |
| 3.79  | $[1.20-1.50] \times 10^{-3}$ | $(3.00 \pm 0.47) \times 10^3$    | $0.90 \pm 0.05$ |
| 3.87  | $[0.50-2.00] \times 10^{-3}$ | $(3.99 \pm 0.56) \times 10^3$    | $1.13 \pm 0.11$ |
| 4.04  | $[0.75-1.00] \times 10^{-3}$ | $(3.47 \pm 0.14) \times 10^3$    | $0.70 \pm 0.04$ |
| 4.18  | $[0.75-1.00] \times 10^{-3}$ | $(2.06 \pm 0.54) \times 10^3$    | $1.01 \pm 0.11$ |
| 4.29  | $[1.20-1.50] \times 10^{-3}$ | $(1.40 \pm 0.24) \times 10^3$    | $1.01 \pm 0.11$ |
| 4.30  | $[1.50-2.00] \times 10^{-3}$ | $(1.05 \pm 0.14) \times 10^3$    | $1.01 \pm 0.11$ |
| 4.56  | $[1.20-1.50] \times 10^{-3}$ | $(9.50 \pm 3.47) \times 10^2$    | $1.01 \pm 0.11$ |
| 4.76  | $[0.75-1.00] \times 10^{-3}$ | $(8.48 \pm 1.91) \times 10^2$    | $1.17 \pm 0.12$ |
| 4.80  | $[1.20-1.50] \times 10^{-3}$ | $(6.68 \pm 0.97) \times 10^2$    | $1.01 \pm 0.11$ |
| 4.96  | $[0.75-1.00] \times 10^{-3}$ | $(3.58 \pm 0.10) \times 10^2$    | $0.88 \pm 0.10$ |
| 5.22  | $[0.75-1.00] \times 10^{-3}$ | $(2.33 \pm 0.10) \times 10^2$    | $0.78 \pm 0.08$ |
| 5.30  | $[0.25-1.00] \times 10^{-3}$ | $(1.85 \pm 0.11) \times 10^2$    | $1.33 \pm 0.14$ |
| 5.46  | $[0.50-1.00] \times 10^{-3}$ | $(1.67 \pm 0.11) \times 10^2$    | $1.23 \pm 0.12$ |
| 5.82  | $[0.50-1.00] \times 10^{-3}$ | $(1.31 \pm 0.10) \times 10^2$    | $1.14 \pm 0.11$ |
| 6.07  | $[0.50-1.00] \times 10^{-3}$ | $(1.17 \pm 0.14) \times 10^2$    | $1.05 \pm 0.10$ |
| 6.50  | $[1.00-1.25] \times 10^{-1}$ | $(1.05 \pm 0.07) \times 10^2$    | $0.94 \pm 0.10$ |
| 7.00  | $[1.00-1.25] \times 10^{-1}$ | $(7.90 \pm 0.50) \times 10^1$    | $0.85 \pm 0.09$ |
| 7.50  | $[1.35-1.50] \times 10^{-1}$ | $(3.00 \pm 0.30) \times 10^1$    | $1.11 \pm 0.12$ |
| 8.00  | $[1.00-1.25] \times 10^{-1}$ | $(1.20 \pm 0.20) \times 10^1$    | $1.03 \pm 0.11$ |
| 8.50  | $[0.30-1.25] \times 10^{-1}$ | $(4.00 \pm 0.11) \times 10^0$    | $1.08 \pm 0.01$ |
| 9.00  | $[0.05-1.00] \times 10^{-1}$ | $(1.72 \pm 0.08) \times 10^0$    | $1.08 \pm 0.02$ |
| 9.24  | $[0.30-2.00] \times 10^{-1}$ | $(1.55 \pm 0.03) \times 10^0$    | $1.19 \pm 0.01$ |
| 9.45  | $[0.30-1.50] \times 10^{-1}$ | $(6.83 \pm 0.37) \times 10^{-1}$ | $1.13 \pm 0.05$ |
| 10.00 | $[0.30-1.50] \times 10^{-1}$ | $(6.00 \pm 0.40) \times 10^{-1}$ | $1.09 \pm 0.05$ |
| 10.14 | $[0.30-1.50] \times 10^{-1}$ | $(3.66 \pm 0.14) \times 10^{-1}$ | $1.09 \pm 0.04$ |
| 10.50 | $[0.30-1.50] \times 10^{-1}$ | $(3.30 \pm 0.20) \times 10^{-1}$ | $1.11 \pm 0.04$ |
| 10.68 | $[0.30-1.50] \times 10^{-1}$ | $(2.76 \pm 0.28) \times 10^{-1}$ | $1.03 \pm 0.16$ |
| 11.00 | $[0.40-1.00] \times 10^{-1}$ | $(1.70 \pm 0.20) \times 10^{-1}$ | $1.19 \pm 0.11$ |
| 11.50 | $[0.95-2.00] \times 10^{-1}$ | $(1.08 \pm 0.08) \times 10^{-1}$ | $1.20 \pm 0.12$ |
| 12.00 | $[0.95-2.00] \times 10^{-1}$ | $(9.00 \pm 0.70) \times 10^{-2}$ | $0.93 \pm 0.10$ |
| 12.40 | $[1.00-2.00] \times 10^{-1}$ | $(8.60 \pm 0.80) \times 10^{-2}$ | $1.26 \pm 0.14$ |

**Table S2.** Rate constants for Fe(VI) oxidation of EDTA at different pH and temperatures.

| Temp, K | pH=5.4 <sup>1</sup>                   | pH=7.1 <sup>1</sup>                   | pH=9.2 <sup>1</sup>                   |
|---------|---------------------------------------|---------------------------------------|---------------------------------------|
|         | $k, 10^2 \text{ M}^{-1}\text{s}^{-1}$ | $k, 10^1 \text{ M}^{-1}\text{s}^{-1}$ | $k, 10^0 \text{ M}^{-1}\text{s}^{-1}$ |
| 288     | 2.32±0.30                             | 0.80±0.01                             | 1.02±0.03                             |
| 293     | 2.55±0.04                             | 0.93±0.04                             | 1.73±0.09                             |
| 298     | 3.55±0.05                             | 1.27±0.08                             | 1.60±0.02                             |
| 303     | 3.97±0.13                             | 1.55±0.01                             | 2.85±0.17                             |
| 308     | 4.52±0.12                             | 1.83±0.02                             | 4.33±0.22                             |
| 313     | 5.15±0.40                             | 2.05±0.07                             | 6.18±0.45                             |
| 318     | 6.28±0.65                             | 2.57±0.04                             | 8.03±0.34                             |

<sup>1</sup>[EDTA]=0.5-1.0 x 10<sup>-3</sup> M
